# Supplementary material for: Co-Aggregation of S100A9 with DOPA and Cyclen-Based Compounds Manifested in Amyloid Fibril Thickening without Altering Rates of Self-Assembly
Source: Int J Mol Sci. 2021 Aug 9;22(16):8556. doi: 10.3390/ijms22168556 (PMC8395260; doi:10.3390/ijms22168556)
Supplement: Supplementary file 1 [file ijms-22-08556-s001.zip]

Archive with 5 entries (5 files):
- Supplementary Materials 2021 0807.pdf
- Supplementary Materials Video S4 .mp4
- Supplementary Materials Video S5.mp4
- Supplementary Materials Video S6.mp4
- Supplementary Materials Video S7.mp4
